# Supplementary material
Source: Research Square preprint supplement (doi:10.21203/rs.3.rs-9479561/v1)
Supplement: Supplementary file 1 [file 49c1082b8e1ab21033897177.docx]

**Additional file 1**

Supplementary methods, supplementary results, Tables S1–S5, and Figures S1–S2

**Supplementary opening note**

This additional file provides supplementary cohort description, retained principal-window dataset structure, and detailed results from the supplementary analyses, including the intraoperative fixed-duration truncation analysis, Bland–Altman agreement assessment, and the continuity-based feasibility analysis. It also clarifies why higher-order feasibility outside the intraoperative stage was constrained not only by shorter retained data but also by fragmentation of retained clean data.

**Supplementary methods**

**S1. Clinical and perioperative characteristics**

Clinical and perioperative characteristics of the study cohort are summarized in Table S1. These data are provided to define the clinical context of the methodological feasibility study but were not used to stratify the primary stage-aware analyzability framework.

**S2. Characteristics of retained principal windows across perioperative stages**

After uniform preprocessing and automated principal-window selection, one retained principal window was preserved for each subject-stage with available raw acquisition. The retained principal-window dataset therefore represented the standardized input for all primary stage-wise feasibility analyses. Table S2 summarizes the characteristics of retained principal windows across perioperative stages. Principal windows were retained using a prespecified ranking rule based on highest analyzable duration (*good_sec*), higher retention ratio, and longer raw window length.

**S3. Intraoperative fixed 120-s truncation analysis**

A supplementary truncation-based analysis was performed to assess whether the apparent intraoperative advantage for Level 2 analyses was solely attributable to longer analyzable duration. In connectivity-eligible intraoperative retained principal windows, fixed 120-s clean segments were sampled and used to recalculate alpha-band and upper-alpha-band global efficiency. These truncated estimates were then compared with the corresponding full-length estimates.

**S4. Continuity-based supplementary analysis**

A second supplementary analysis was performed to evaluate whether higher-order feasibility depended not only on total analyzable duration but also on continuity of retained clean data. For each retained principal window, the longest uninterrupted clean segment was identified and summarized. This continuity-based analysis was intended to provide methodological support for interpretation and was not intended to replace the prespecified primary stage-aware framework.

**Supplementary results**

**S1. Clinical and perioperative characteristics**

Clinical and perioperative characteristics of the study cohort are presented in Table S1. These data provide context for the cohort in which the stage-aware EEG analyzability framework was developed.

**S2. Characteristics of retained principal windows across perioperative stages**

Retained principal windows across perioperative stages are summarized in Table S2. One principal window was retained per subject-stage after uniform preprocessing and fully automated ranking. This standardized dataset formed the basis for all primary stage-wise feasibility analyses presented in the main manuscript.

**S3. Intraoperative fixed 120-s truncation analysis**

Results of the intraoperative truncation analysis are presented in Table S3 and Figures S1–S2. Truncated 120-s estimates remained highly consistent with the corresponding full-length estimates for both alpha-band GE and upper-alpha GE, with strong Pearson correlations (r = 0.961 and 0.978, respectively) and minimal mean bias (0.004 and 0.006, respectively). Bland–Altman plots further showed small average differences and acceptable limits of agreement, supporting the stability of these higher-order estimates after fixed-length truncation.

**S4. Continuity-based supplementary analysis**

Continuity-related summaries are presented in Table S4, and continuity-aware higher-order feasibility is summarized in Table S5. Across perioperative stages, the longest uninterrupted clean segment was substantially more favorable intraoperatively than preoperatively or postoperatively; continuity-aware higher-order eligibility was 32/43 (74.4%) intraoperatively versus 9/56 (16.1%) in both the preoperative and postoperative stages.

**Supplementary Tables**

**Table S1. Selected clinical and perioperative characteristics of the study cohort**

| **Characteristic** | **Overall** |
| --- | --- |
| **Study cohort, n** | 61 |
| **Age, y** | 67 (63-71) |
| **Male sex, n (%)** | 56 (91.8%) |
| **Education, y** | 9 (6-9) |
| **Body mass index, kg/m^2** | 23.2 (21.5-25.6) |
| **ASA physical status I-II, n (%)** | 47 (77.0%) |
| **ASA physical status III-IV, n (%)** | 14 (23.0%) |
| **Charlson Comorbidity Index** | 0 (0-1) |
| **Frailty score** | 1 (0-2) |
| **Operation time, min** | 180 (150-200) |

Continuous variables are presented as median (IQR), and categorical variables as n (%). ASA, American Society of Anesthesiologists physical status.

**Table S2. Characteristics of retained principal windows across perioperative stages**

| **Stage** | **Retained principal windows, n** | **Full-recording retained, n (%)** | **Sub-window retained, n (%)** | ***good_sec*, median (IQR), s** | **Retention ratio, median (IQR)** | **Raw window length, median (IQR), s** |
| --- | --- | --- | --- | --- | --- | --- |
| **Preoperative** | 56 | 26 (46.4%) | 30 (53.6%) | 153 (113-258) | 0.68 (0.50-0.86) | 295 (147-435) |
| **Intraoperative** | 43 | 1 (2.3%) | 42 (97.7%) | 678 (488-826) | 0.99 (0.96-1.00) | 689 (516-856) |
| **Postoperative** | 56 | 51 (91.1%) | 5 (8.9%) | 112 (76-137) | 0.78 (0.55-0.89) | 145 (125-198) |

Values are presented as median (IQR) or n (%), as appropriate. One principal window was retained per subject-stage after uniform preprocessing and fully automated ranking based on highest analyzable duration (*good_sec*), higher retention ratio, and longer raw window length.

**Table S3.** **Intraoperative 120-s truncation analysis for connectivity-derived network metrics**

| **Metric** | **Pearson correlation coefficient (r)** | **Mean bias** | **Subjects, n** |
| --- | --- | --- | --- |
| Alpha-band GE | 0.961 | 0.004 | 41 |
| Upper-alpha GE | 0.978 | 0.006 | 41 |

Connectivity-eligible intraoperative retained principal windows were truncated to fixed 120-s clean segments, and alpha-band and upper-alpha-band global efficiency were recalculated. Pearson correlation coefficients summarize the linear association between truncated and full-length estimates across subjects. Mean bias was defined as the mean difference between truncated 120-s estimates and corresponding full-length estimates (truncated minus full-length).

**Table S4. Continuity-based clean-segment summary across perioperative stages**

| **Stage** | **Retained principal windows, n** | **Mean total analyzable duration, s** | **Median total analyzable duration, s** | **Mean longest uninterrupted clean segment, s** | **Median longest uninterrupted clean segment, s** | **Windows with uninterrupted segment ≥90 s, n** | **Windows with uninterrupted segment ≥120 s, n** | **Windows with uninterrupted segment ≥180 s, n** |
| --- | --- | --- | --- | --- | --- | --- | --- | --- |
| **Preoperative** | 56 | 189.5 | 153 | 66.3 | 50 | 14 | 9 | 1 |
| **Intraoperative** | 43 | 657.9 | 678 | 476.8 | 442 | 39 | 39 | 32 |
| **Postoperative** | 56 | 112.2 | 112 | 51.8 | 45 | 9 | 5 | 0 |

This table summarizes continuity-related properties of retained principal windows across perioperative stages, including total analyzable duration and the longest uninterrupted clean segment. Continuity was evaluated to assess whether higher-order feasibility depended not only on analyzable duration but also on preservation of sufficiently long uninterrupted clean data.

**Table S5. Continuity-aware summary of higher-order feasibility**

| **Stage** | **Rule** | **Continuity-aware eligible windows** |
| --- | --- | --- |
| **Preoperative** | Longest uninterrupted clean segment ≥120 s | 9/56 (16.1%) |
| **Intraoperative** | Longest uninterrupted clean segment ≥180 s | 32/43 (74.4%) |
| **Postoperative** | Longest uninterrupted clean segment ≥90 s | 9/56 (16.1%) |

This table summarizes supplementary higher-order feasibility using the longest uninterrupted clean segment within each retained principal window. The continuity-aware analysis was used as methodological support for interpretation and not as a replacement for the prespecified primary stage-aware framework.

**Supplementary figure legends**

**Figure S1. Full-length versus truncated 120-s intraoperative global-efficiency estimates.**

Each point represents one intraoperative retained principal window eligible for Level 2 analysis. The dashed diagonal line indicates identity (y = x). Full-length estimates are shown on the x-axis and corresponding truncated 120-s mean estimates on the y-axis. Separate panels show alpha-band and upper-alpha-band global efficiency. Within each panel, *r* denotes the Pearson correlation coefficient between truncated and full-length estimates, and bias denotes the mean difference between truncated and full-length estimates (truncated minus full-length).

**Figure S2. Bland–Altman plots for truncated versus full-length intraoperative global-efficiency estimates.**

Each point represents one intraoperative retained principal window eligible for Level 2 analysis. The x-axis shows the mean of the truncated and full-length estimates, and the y-axis shows their difference (truncated minus full-length). Separate panels show alpha-band and upper-alpha-band global efficiency. Solid horizontal lines indicate mean bias, and dashed horizontal lines indicate the 95% limits of agreement (mean bias ± 1.96 SD).
